# Supplementary material
Source: Elsevier journal article supplement (https://comptes-rendus.academie-sciences.fr/chimie/article/10.1016/j.crci.2008.06.020/file/attach/mmc2.pdf)
Supplement: mmc2 [file mmc2.pdf]

## Supporting Information 2 (Oliveira et al.)

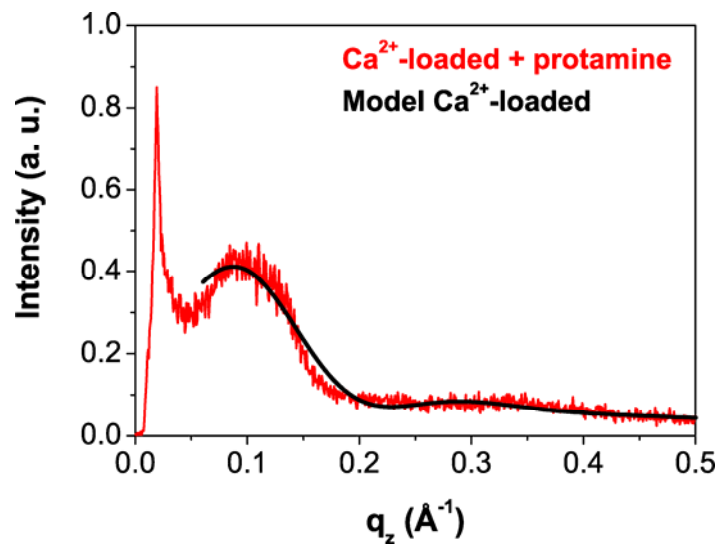

GIXOS curve and the reconstructed electron density profile of the LPS Ra monolayer on Ca<sup>2+</sup>-loaded buffer after the protamine injection (green). The measured curve can be well represented with the best-fit result of the same monolayer without protamine (black), indicating that protamine molecules entering the Ca<sup>2+</sup>-enriched region is too small to alter the electron density profile.
